# Supplementary material
Source: publisher figshare collection journal article supplement (https://tandf.figshare.com/articles/dataset/_/24597296)

Appendix 5


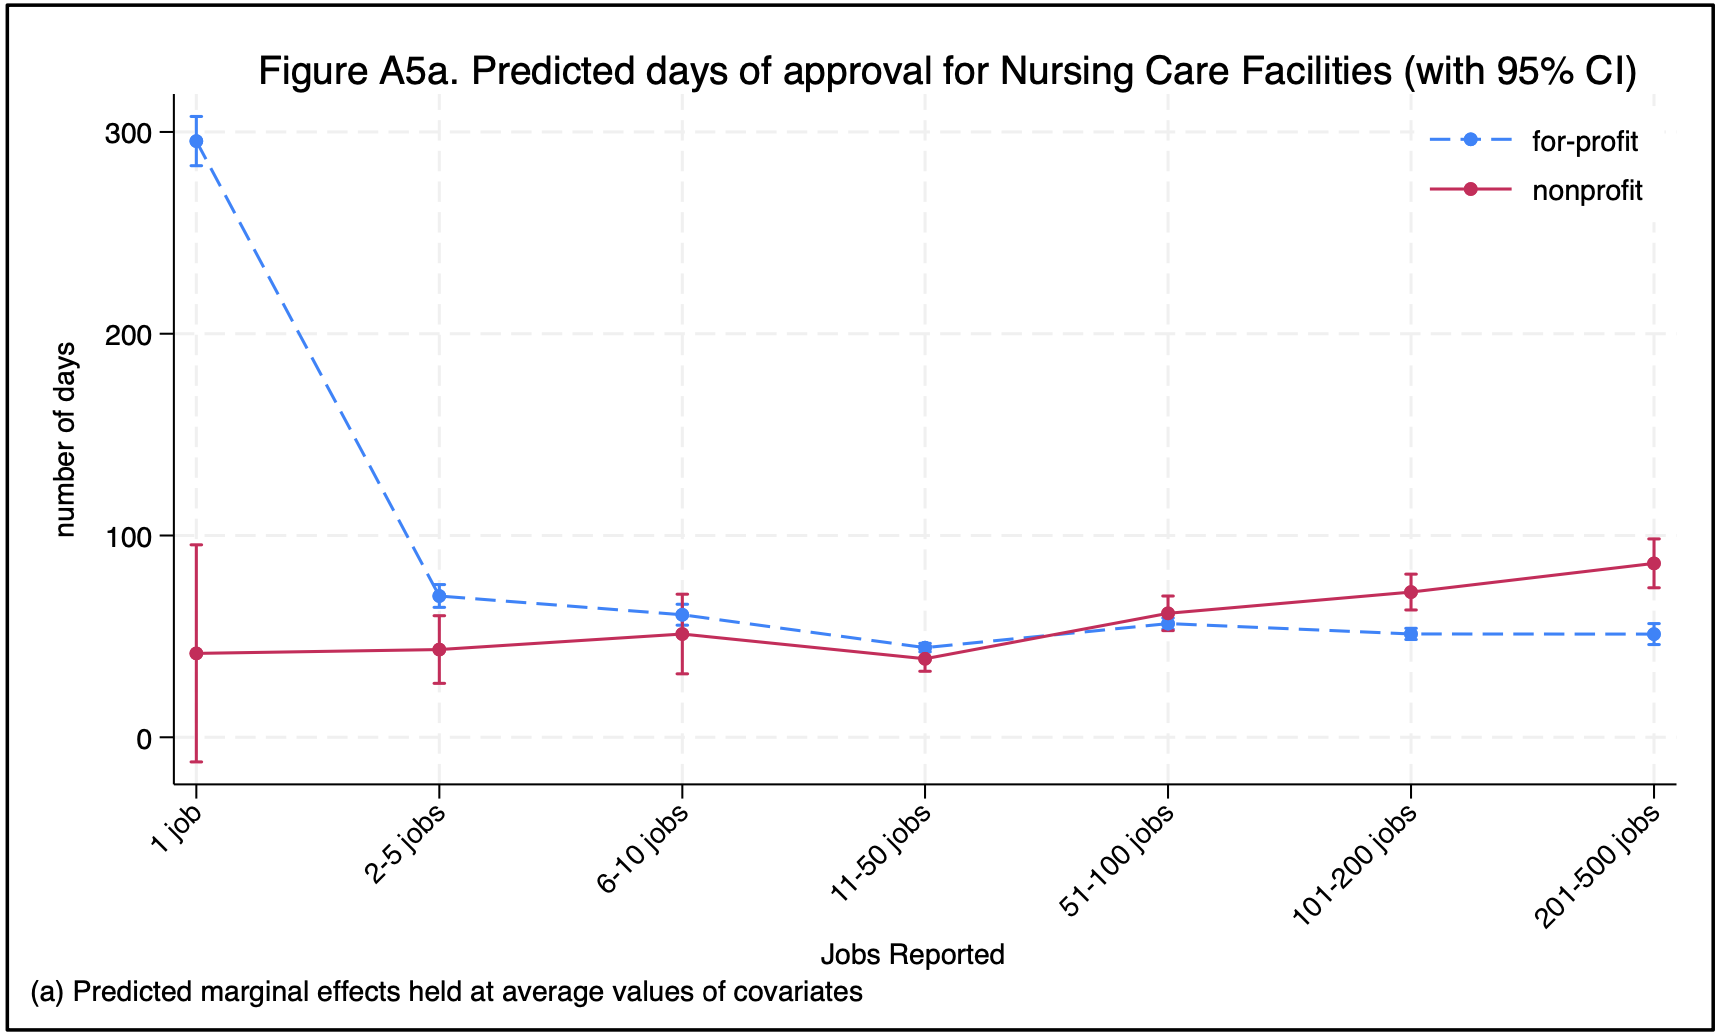


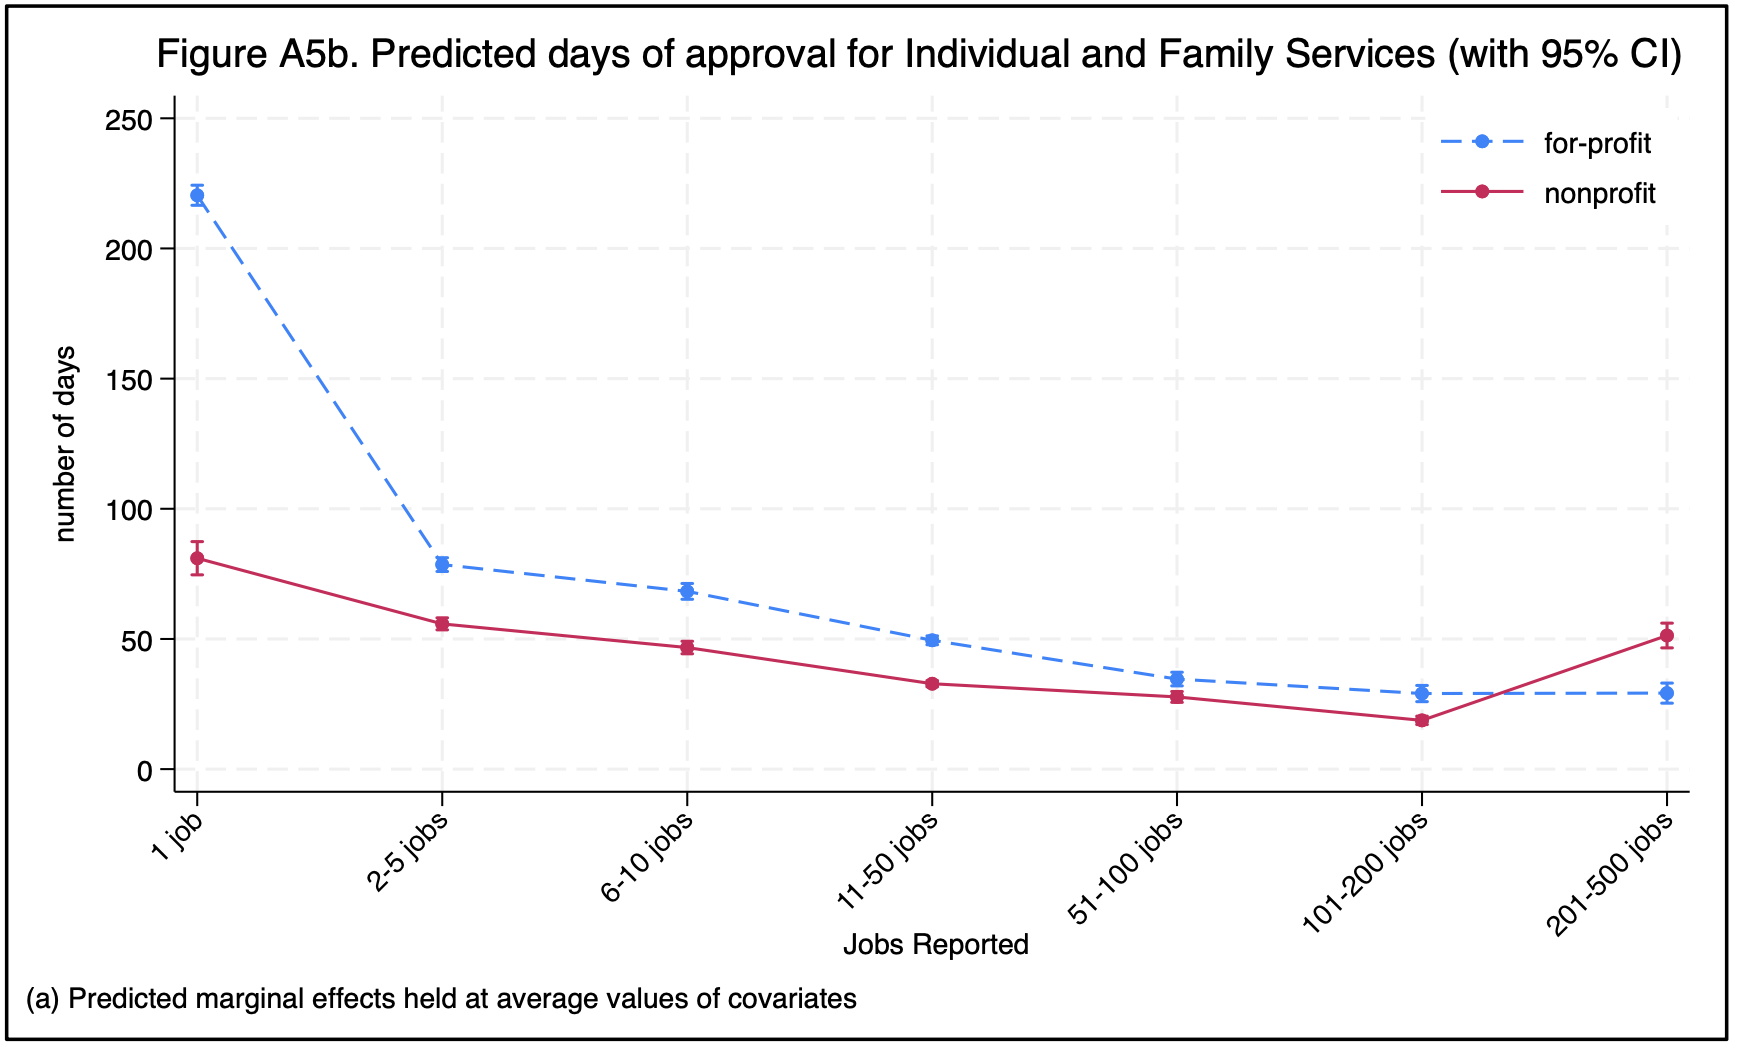


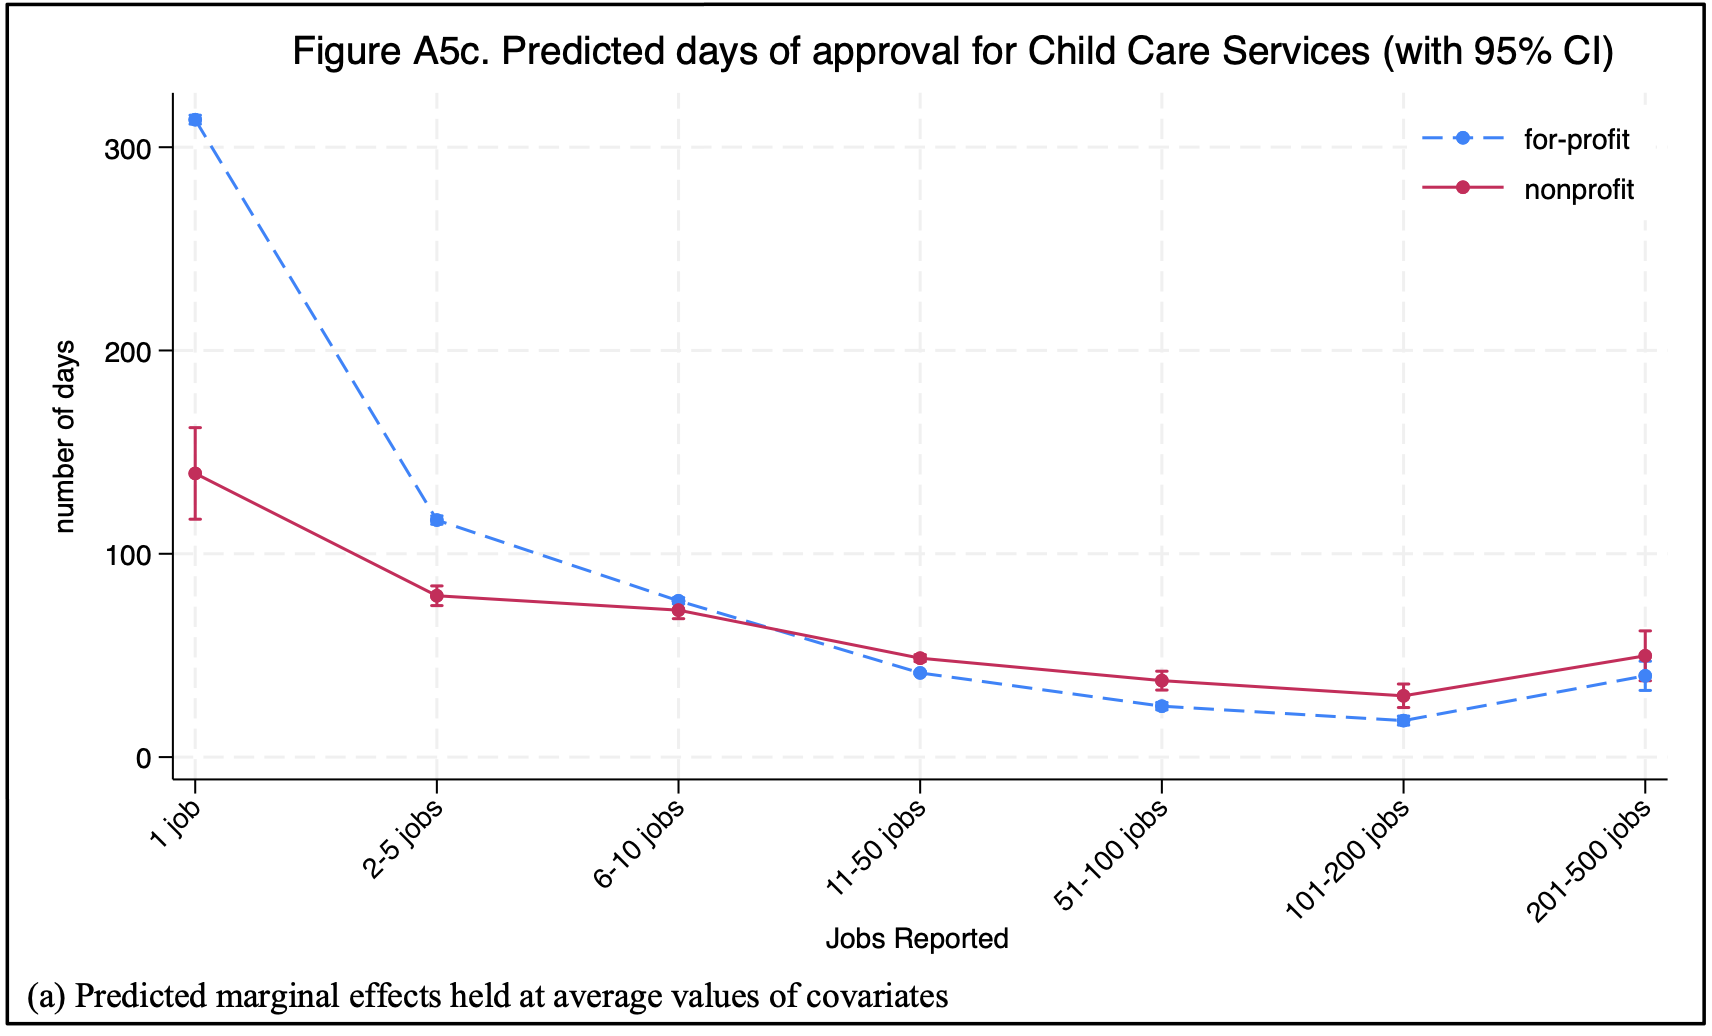


Appendix 6


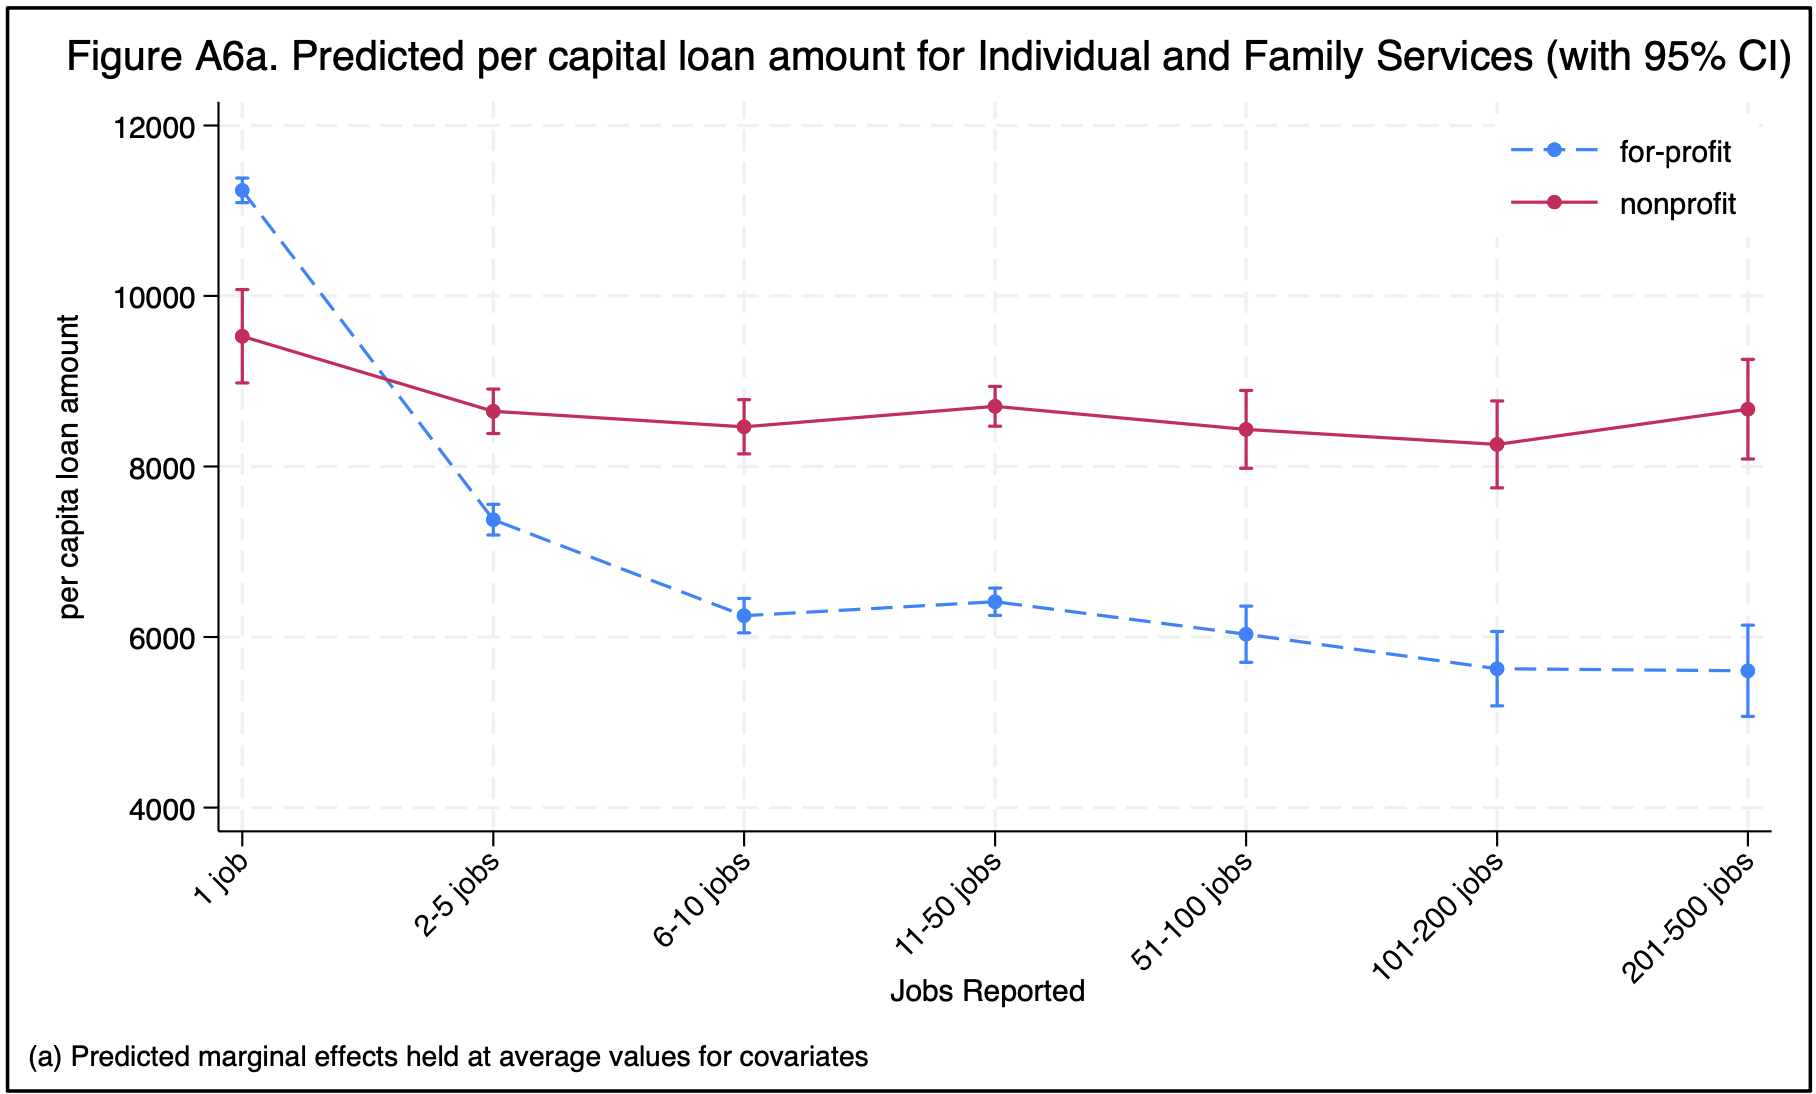


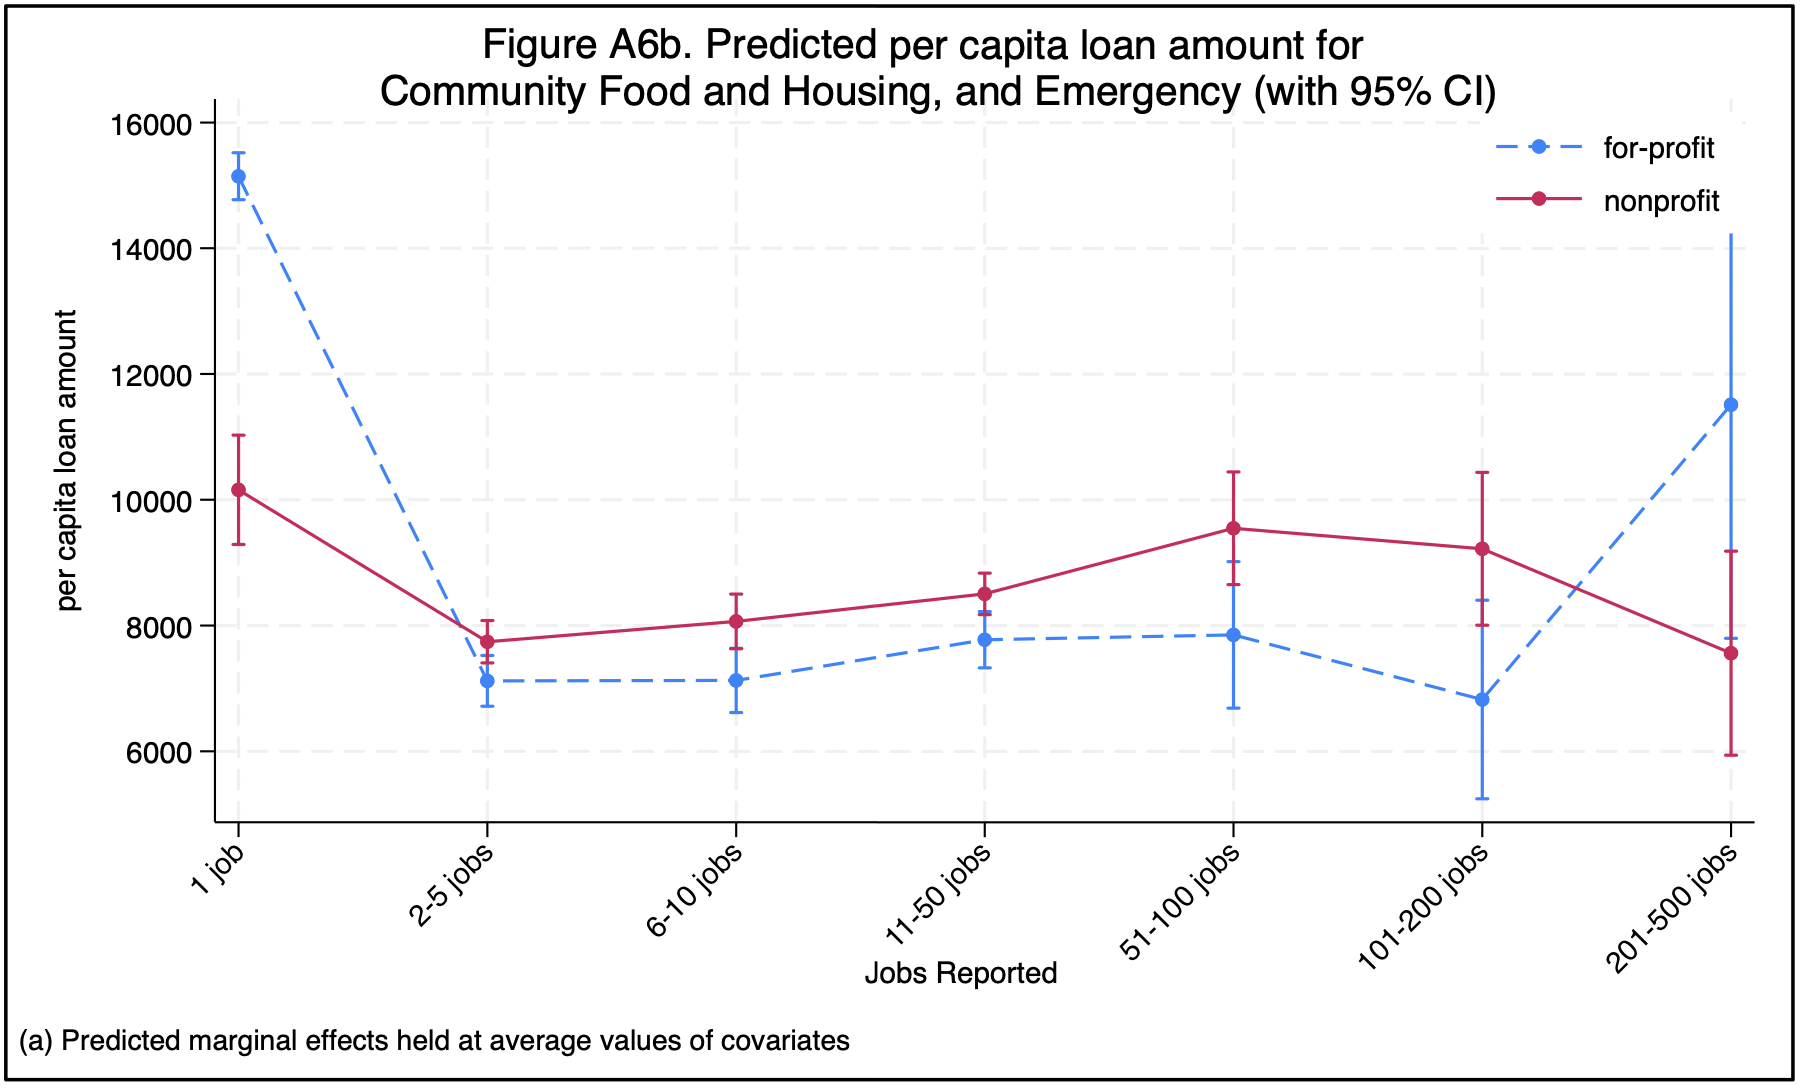


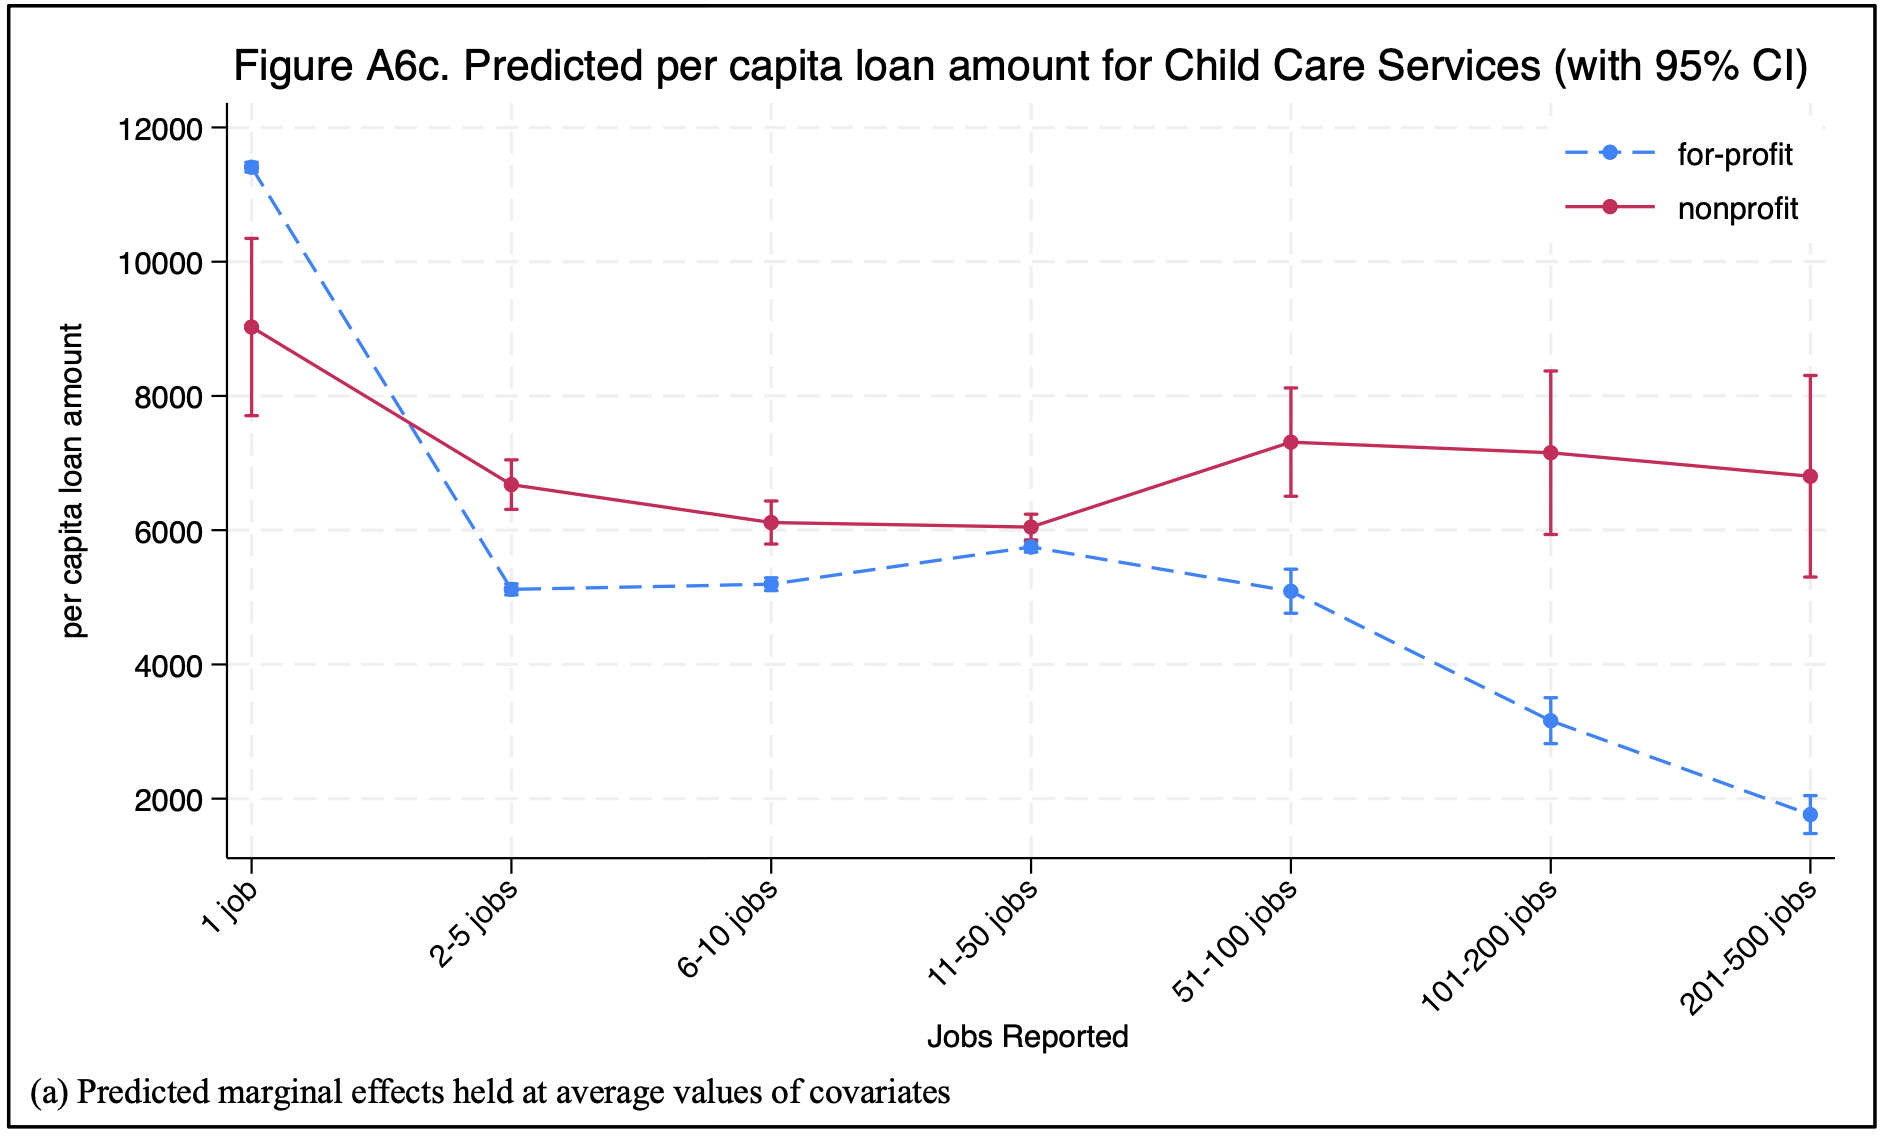


Appendix 7


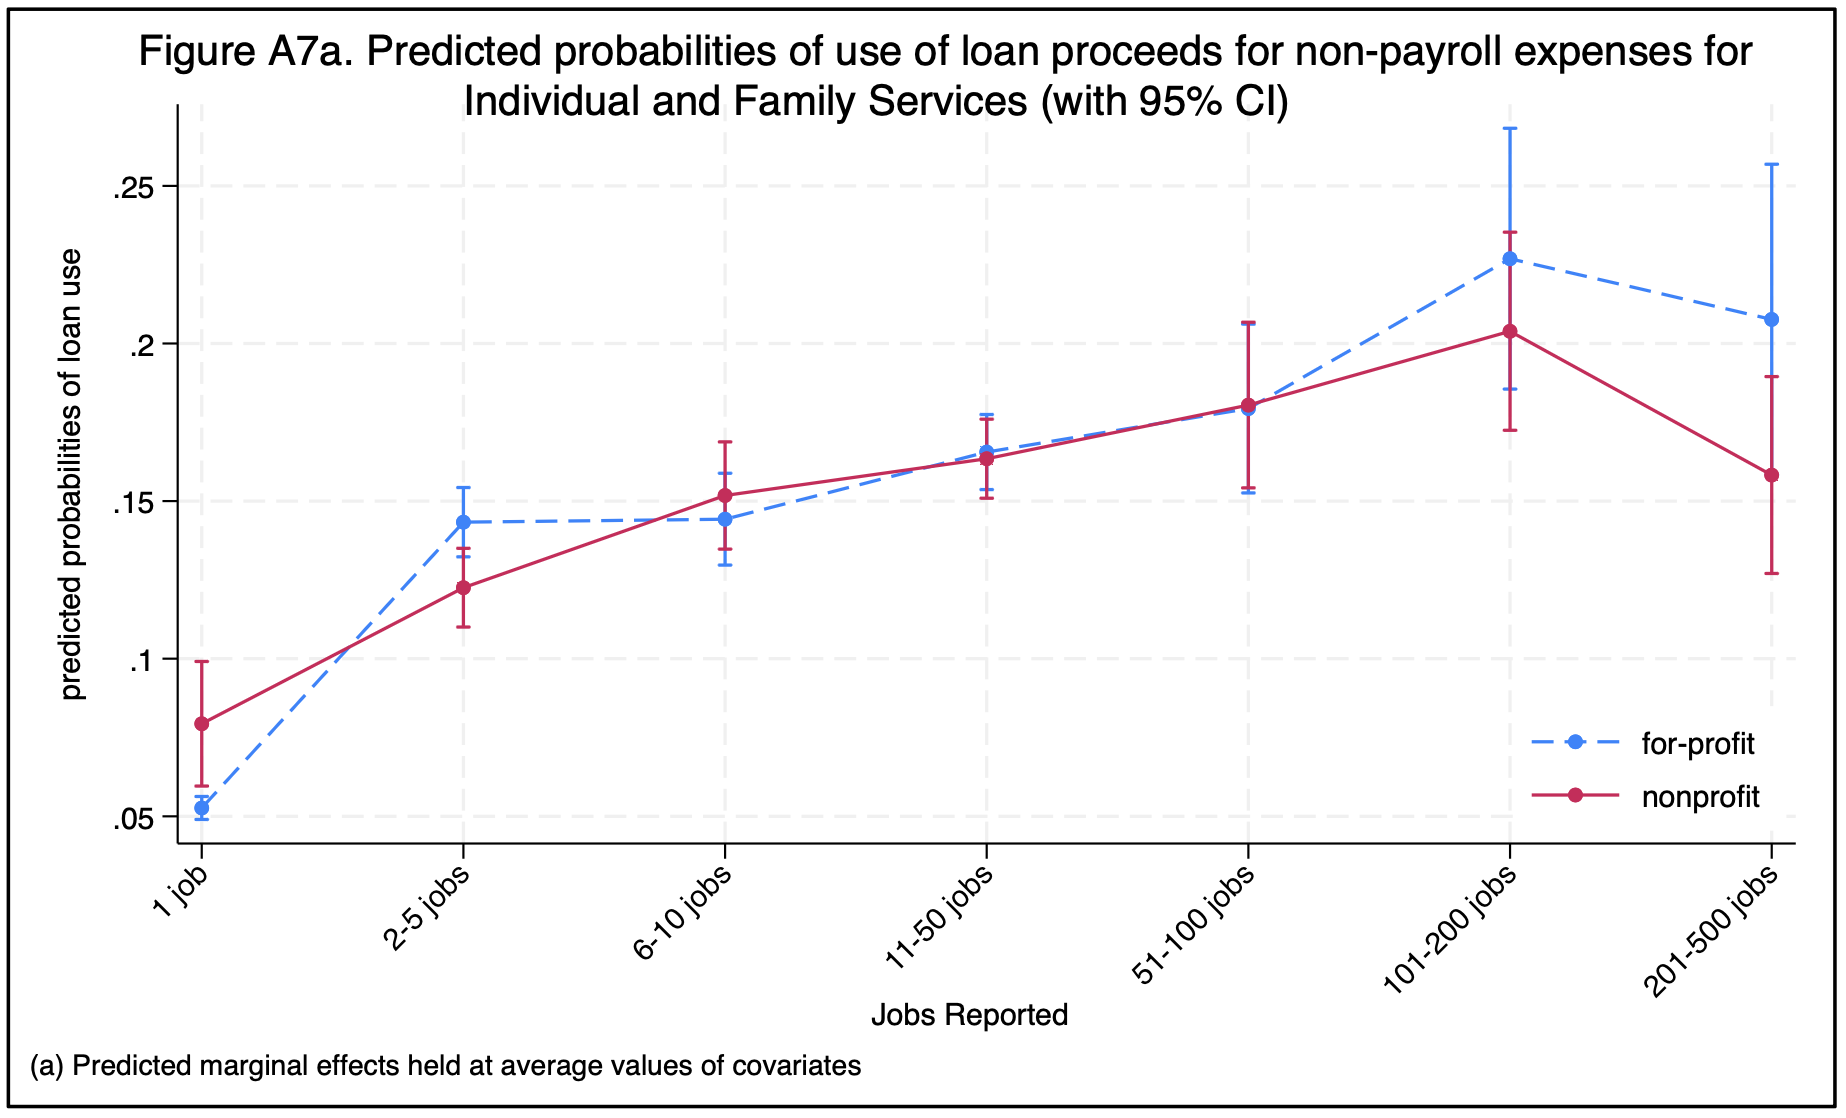


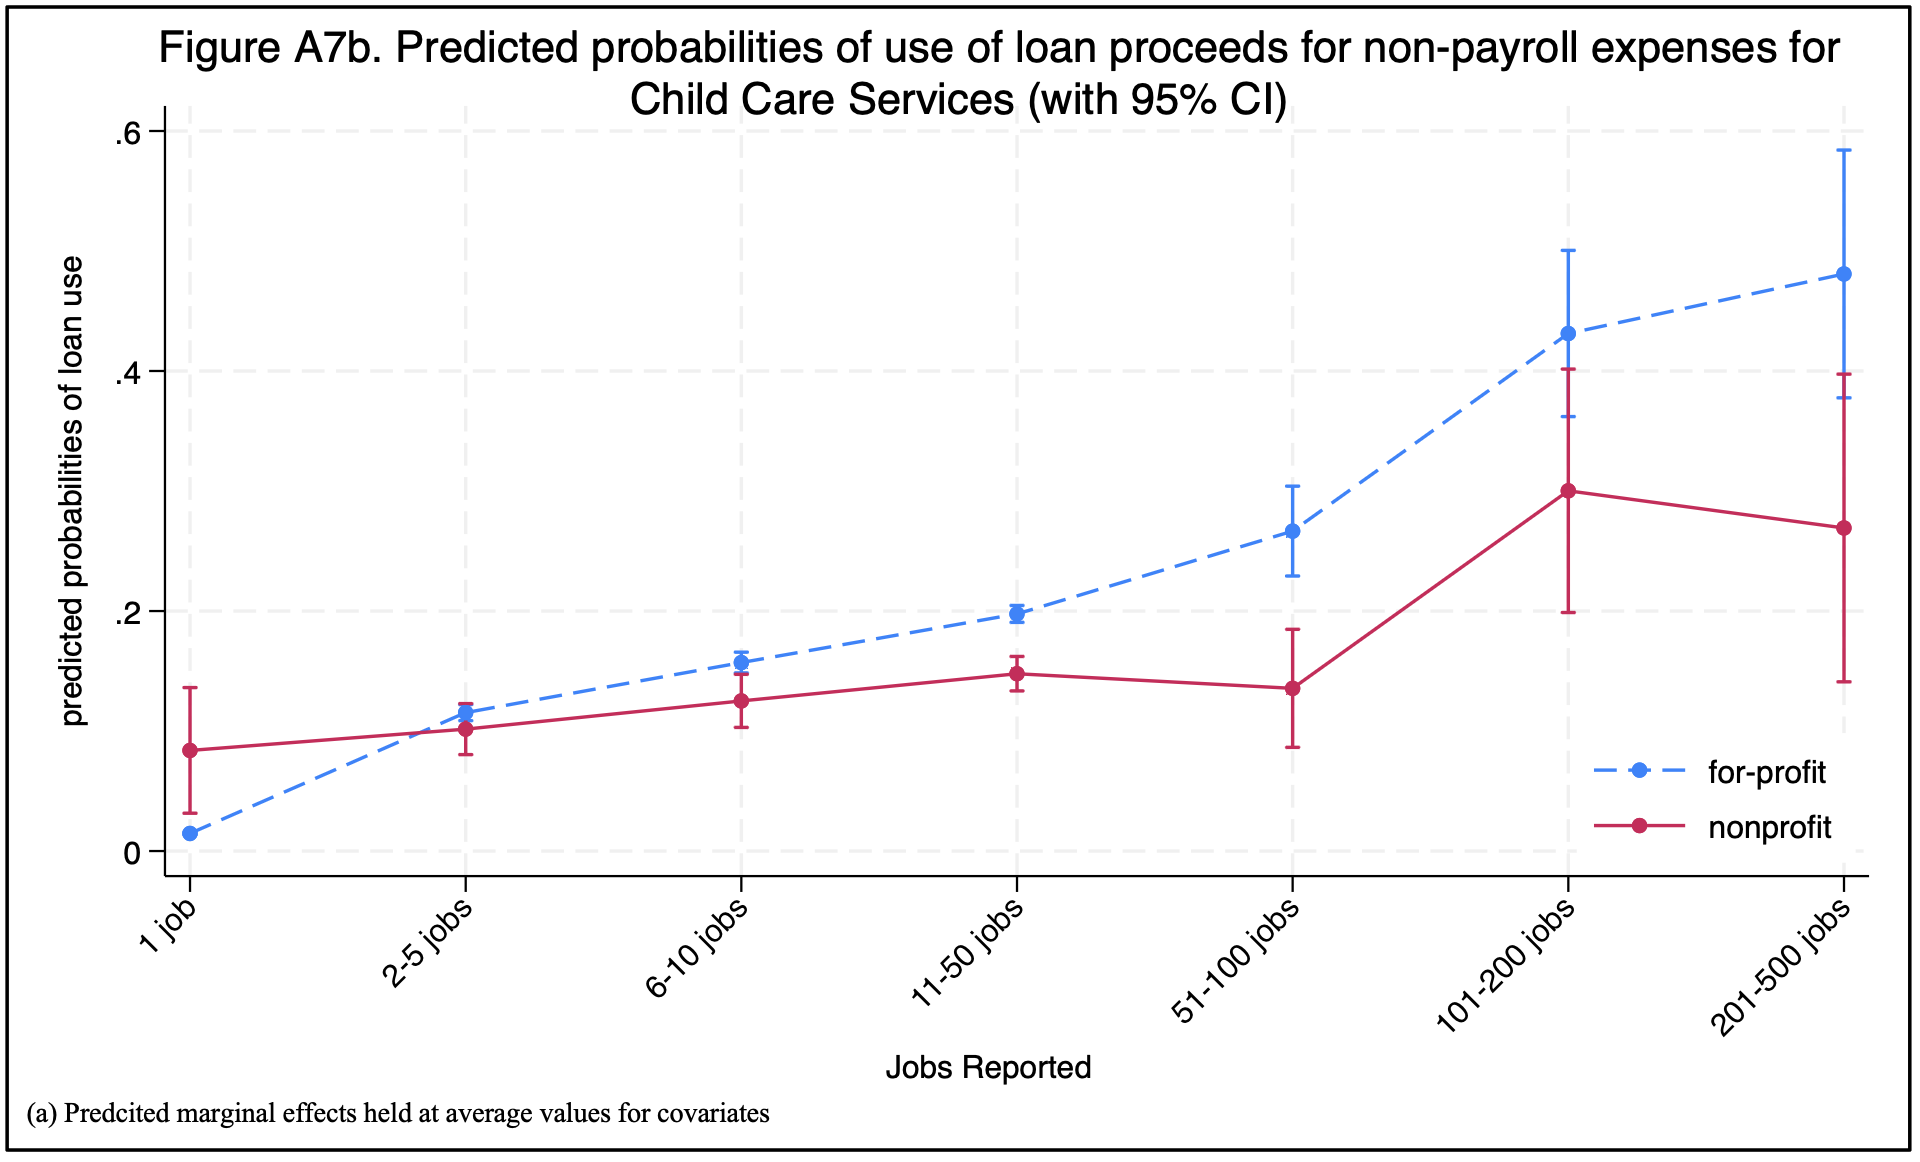

Supplement: Supplementary file 1 [file 2]
